# Supplementary material
Source: MDPI journal article supplement (https://www.mdpi.com/2073-4441/10/8/1069)
Supplement: s1 [file s1]

**Table S1.** Removal efficiency and standard deviations in the form of: (removal efficiency  $\pm$  standard deviation), for each pollutant for different filter media types and HCs (10, 20, and 30 m/h).

|     | HC<br>(m/h) | Media type                          |           |           |           |           |           |
|-----|-------------|-------------------------------------|-----------|-----------|-----------|-----------|-----------|
|     |             | S-BA                                | BA-S      | S-WC-BA   | BA-WC-S   | S-BA-WC   | BA-S-WC   |
| TSS | 10          | 93 <sup>a</sup> (0.49) <sup>b</sup> | 91 (0.43) | 89 (0.63) | 87 (0.60) | 86 (0.66) | 84 (0.82) |
|     | 20          | 91 (0.68)                           | 89 (0.46) | 87 (0.41) | 84 (0.57) | 83 (0.79) | 82 (0.76) |
|     | 30          | 83 (1.7)                            | 81 (1.1)  | 78 (0.74) | 76 (0.60) | 74 (0.67) | 72 (0.89) |
| BOD | 10          | 67 (1.0)                            | 65 (0.99) | 63 (0.90) | 61 (1.0)  | 58 (1.4)  | 57 (1.6)  |
|     | 20          | 65 (3.5)                            | 62 (1.1)  | 61 (0.68) | 58 (0.78) | 56 (0.97) | 53 (1.5)  |
|     | 30          | 56 (4.2)                            | 55 (2.0)  | 53 (1.6)  | 52 (4.0)  | 48 (1.3)  | 47 (0.95) |
| COD | 10          | 52 (0.72)                           | 49 (1.1)  | 45 (1.0)  | 44 (1.4)  | 43 (1.1)  | 41 (0.96) |
|     | 20          | 47 (1.1)                            | 45 (1.4)  | 43 (0.99) | 42 (0.82) | 41 (1.0)  | 39 (0.75) |
|     | 30          | 42 (1.4)                            | 40 (1.8)  | 38 (1.0)  | 37 (1.3)  | 37 (1.9)  | 36 (1.2)  |
| T-N | 10          | 55 (3.3)                            | 52 (1.5)  | 48 (0.72) | 47 (1.1)  | 45 (1.1)  | 44 (3.3)  |
|     | 20          | 50 (2.3)                            | 48 (1.4)  | 47 (1.1)  | 46 (0.87) | 42 (3.2)  | 41 (1.4)  |
|     | 30          | 45 (1.1)                            | 43 (1.6)  | 41 (0.55) | 39 (1.2)  | 38 (0.61) | 39 (1.3)  |
| T-P | 10          | 64 (3.3)                            | 65 (6.0)  | 59 (5.1)  | 62 (4.7)  | 60 (7.2)  | 56 (3.8)  |
|     | 20          | 63 (2.8)                            | 63 (5.2)  | 60 (1.3)  | 54 (2.7)  | 55 (4.1)  | 51 (2.8)  |
|     | 30          | 56 (4.2)                            | 57 (4.7)  | 56 (4.3)  | 54 (4.8)  | 52 (6.2)  | 51 (8.4)  |

a: average removal efficiency, %; b: standard deviation.

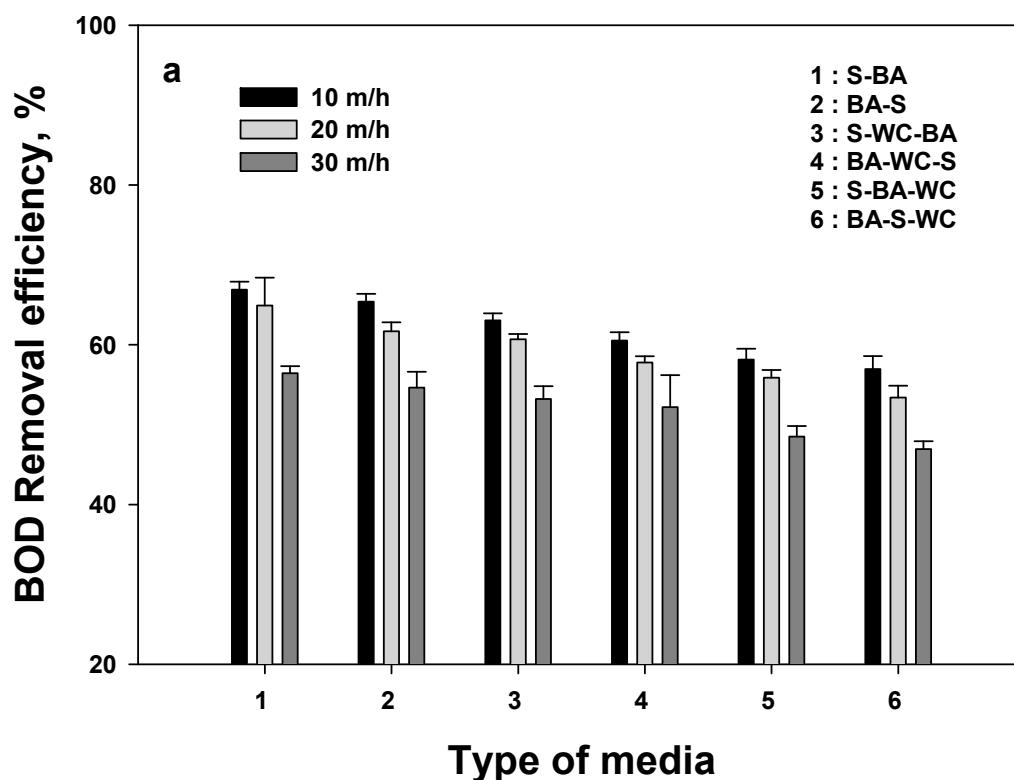

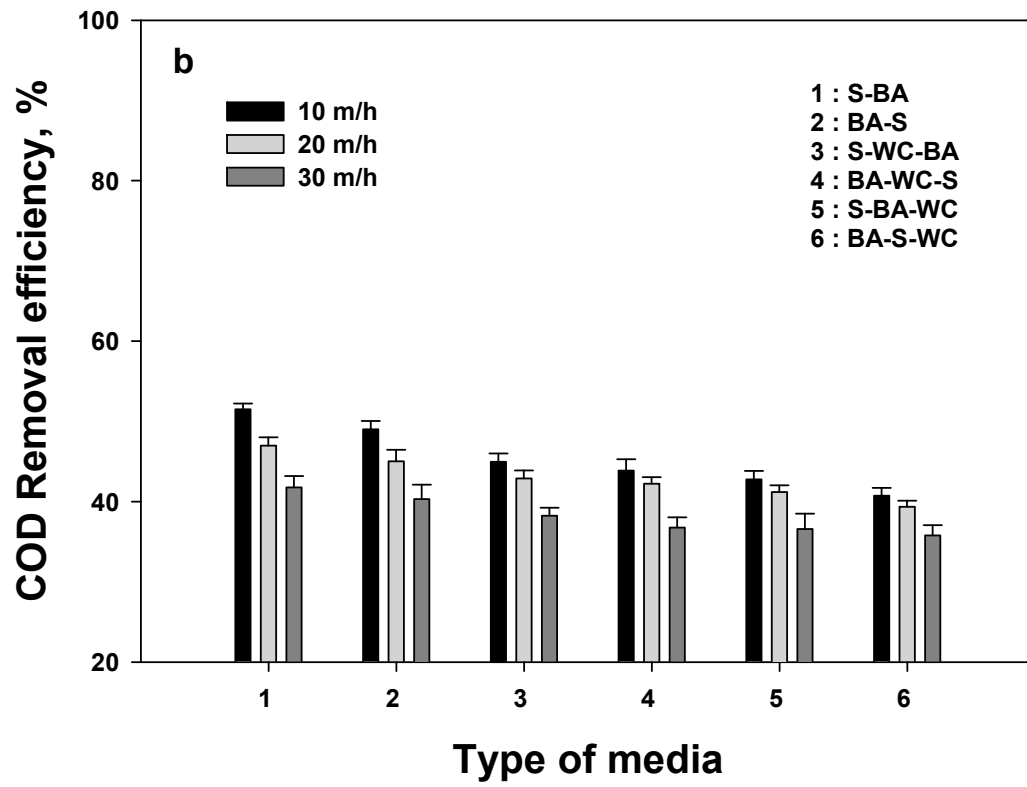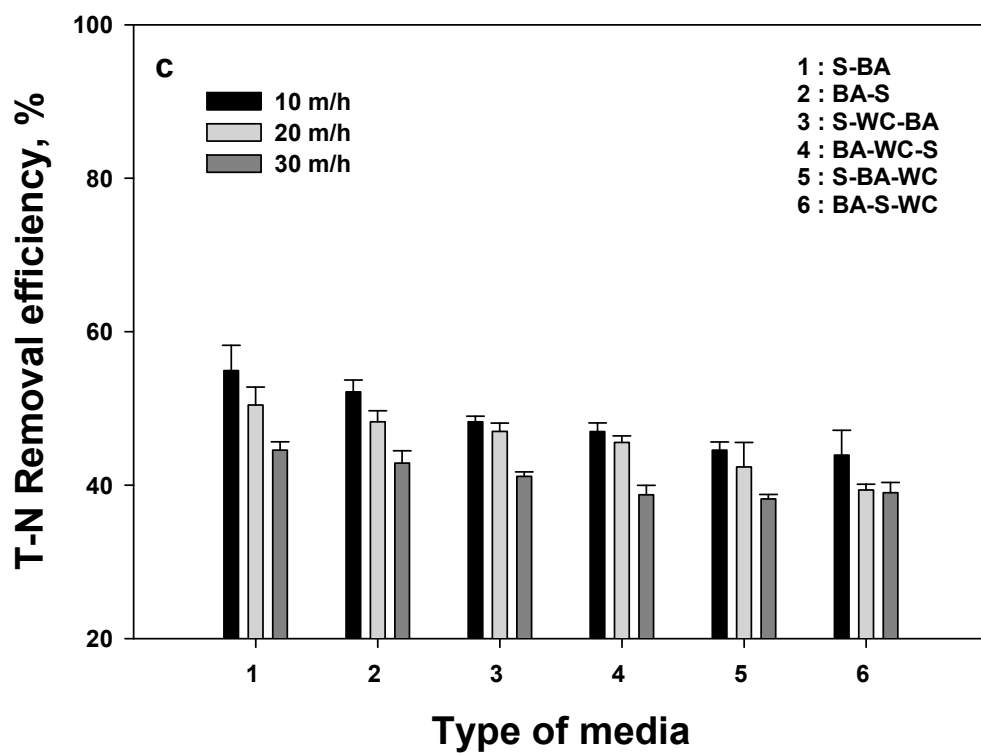

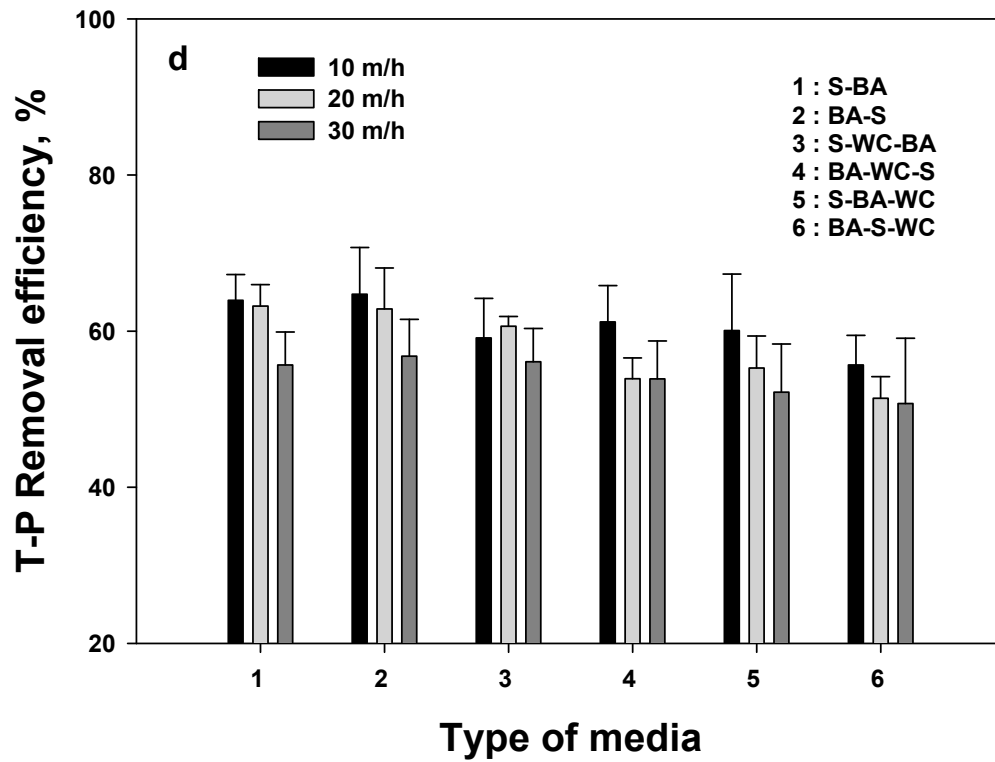

**Figure S1.** Removal efficiencies of BOD (a), COD (b), T-N (c), and T-P (d) for six media types and three different HCs.
